# Supplementary material for: How organic switches grafting on TiO2 modifies the surface potentials: theoretical insights
Source: Royal Society of Chemistry journal article supplement (doi:10.1039/d3ra00537b), 2023-01-01
Supplement: d3ra00537b1.pdf [file d3ra00537b1.pdf]

# How organic switches grafting on TiO<sub>2</sub> modifies the surface potentials: Theoretical insights

Haiming Huang,<sup>1,2,\*</sup> Mingquan Ding,<sup>1,2</sup> Yu Zhang,<sup>1,2</sup> Shuai Zhang,<sup>1,2</sup> Yiyun Ling,<sup>1</sup> Weiliang Wang<sup>3,\*</sup> and Shaolin Zhang<sup>1,2,\*</sup>

<sup>1</sup> Solid State Physics & Material Research Laboratory, School of Physics and Materials Science, Guangzhou University, Guangzhou 510006, China

<sup>2</sup> Research Center for Advanced Information Materials (CAIM), Huangpu Research and Graduate School of Guangzhou University, Guangzhou 510555, China.

<sup>3</sup> School of Physics, Guangdong Province Key Laboratory of Display Material and Technology, Sun Yat-sen University, Guangzhou 510275, China.

\* Corresponding authors. Electronic mail: [huanghm@gzhu.edu.cn](mailto:huanghm@gzhu.edu.cn) (H. Huang), [wangwl2@mail.sysu.edu.cn](mailto:wangwl2@mail.sysu.edu.cn) (W. Wang), [slzhang@gzhu.edu.cn](mailto:slzhang@gzhu.edu.cn) (S. Zhang)

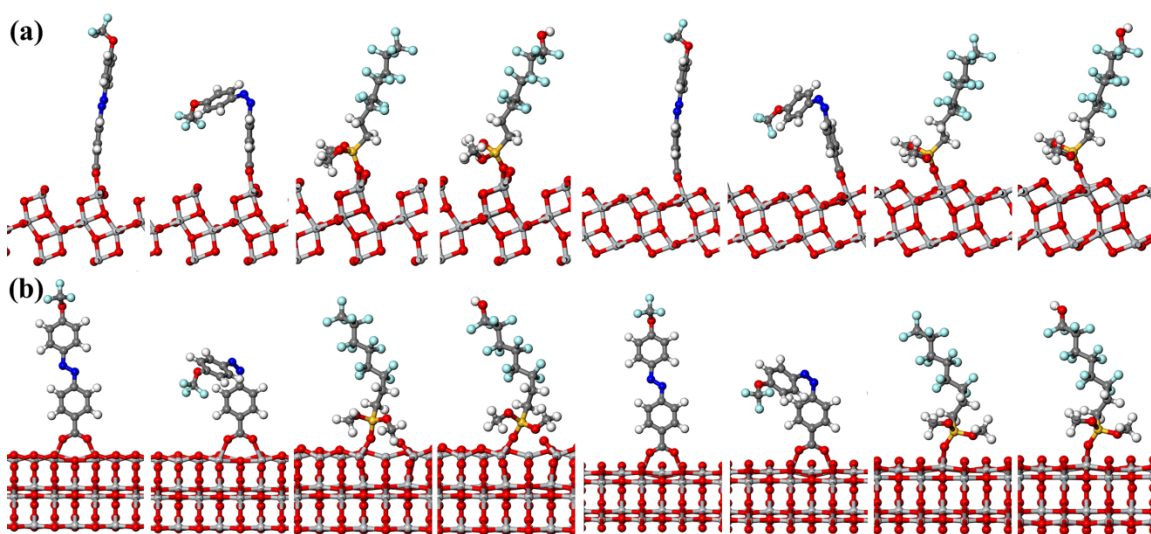

Figure S1 Adsorbed structures of trans-FAZB, cis-FAZB, PFOS-F and PFOS-OH on anatase (101)-I (four leftmost) and anatase (101)-II (four rightmost) surface viewed along (a) y-axis and (b) x-axis. The white, gray, blue, red, gold, light gray and light blue spheres represent hydrogen, carbon, nitrogen, oxygen, silicon, titanium and fluorine atoms, respectively.

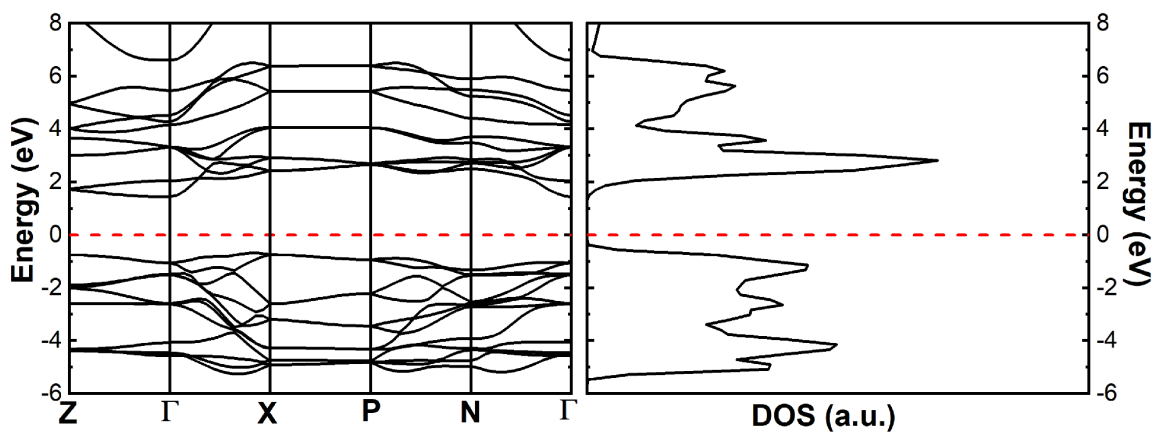

Figure S2 The electronic band structure (left panel) and the corresponding density of states (right panel) of bulk anatase. The Fermi level is set to zero.

Table S1 Parameterization schemes in adsorption energy calculation for trans-FAZB on  $\text{TiO}_2$  (101)-II surface.

| Scheme Number | Cutoff (eV) | Force Convergence Criteria (eV/Å) | Adsorption Energy (eV) |
|---------------|-------------|-----------------------------------|------------------------|
| 1             | 300         | 0.01                              | -2.94                  |
| 2             | 350         | 0.01                              | -2.42                  |
| 3             | 400         | 0.01                              | -2.15                  |
| 4             | 500         | 0.01                              | -2.12                  |
| 5             | 600         | 0.01                              | -2.16                  |
| 6             | 400         | 0.001                             | -2.15                  |

Table S2 Height difference between the outermost atom of the organic unit and the interface for 12 species of considered hybrid systems.

| Structure<br>(label as in Fig.1 and S1) | Distance (Å) |
|-----------------------------------------|--------------|
| trans-FAZB/(100)                        | 16.27        |
| cis-FAZB/(100)                          | 6.20         |
| trans-FAZB/(101)-I                      | 15.95        |
| cis-FAZB/(101)-I                        | 5.62         |
| trans-FAZB/(101)-II                     | 15.79        |
| cis-FAZB/(101)-II                       | 6.42         |
| PFOS-F/(100)                            | 13.28        |
| PFOS-OH/(100)                           | 13.63        |
| PFOS-F/(101)-I                          | 12.19        |
| PFOS-OH/(101)-I                         | 11.72        |
| PFOS-F/(101)-II                         | 12.53        |
| PFOS-OH/(101)-II                        | 12.99        |
